# Supplementary material for: Synthesis and photothermal performance of non-stoichiometric molybdenum oxide (MoO3−x) prepared by gamma radiation
Source: Royal Society of Chemistry journal article supplement (doi:10.1039/d3dt00183k), 2023-01-01
Supplement: d3dt00183k1.pdf [file d3dt00183k1.pdf]

Supporting Information

## Synthesis and photothermal performance of non-stoichiometric molybdenum oxide ( $\text{MoO}_{3-x}$ ) prepared by gamma radiation

*Diane C A Lima<sup>a,b</sup>, Aldebarã F Ferreira,<sup>a</sup> Stterferson E Silva,<sup>a</sup> Severino Alves Junior,<sup>a</sup> Felipe L N Sousa,<sup>a,c</sup> Walter M de Azevedo<sup>\*a</sup>*

<sup>a</sup> Departamento de Química Fundamental, Universidade Federal de Pernambuco, 50670-901, Recife, PE, Brazil.

<sup>b</sup> Departamento de Química, Universidade de São Paulo, 14040-900, Ribeirão Preto, SP, Brazil.

<sup>c</sup> Centro de Tecnologias Estratégicas do Nordeste, CETENE, 50740-545, Recife, PE, Brazil.

[walter.azevedo@ufpe.br](mailto:walter.azevedo@ufpe.br)

### Summary

|                                                                                            |       |
|--------------------------------------------------------------------------------------------|-------|
| <b>Structural advancing of <math>\text{MoO}_3</math> with the <math>\gamma</math>-dose</b> | S2-S3 |
| SEM imagens of (water) $\text{MoO}_{3-x}$                                                  | S4    |
| SEM imagens of (DMF) $\text{MoO}_{3-x}$                                                    | S4    |
| SEM imagens of (FA) $\text{MoO}_{3-x}$                                                     | S5    |
| Tauc plot for water- $\text{MoO}_{3-x}$                                                    | S5    |
| Tauc plot for DMF- $\text{MoO}_{3-x}$                                                      | S6    |
| Tauc plot for FA- $\text{MoO}_{3-x}$                                                       | S6    |
| References                                                                                 | S7    |

## Structural advancing of MoO<sub>3</sub> with the $\gamma$ -dose

From the analysis of X-ray diffractograms, it's possible to assess the evolution of exfoliation in the structure of  $\alpha$ -MoO<sub>3</sub>, as a function of  $\gamma$ -dose. The orthorhombic structure of  $\alpha$ -MoO<sub>3</sub> has the preferred planes of greater intensity (020) with lattice parameters,  $a = 3.787 \text{ \AA}$ ,  $b = 13.686 \text{ \AA}$ , and  $c = 3.787 \text{ \AA}$ . Depending on the dose of gamma radiation and the solvent used, advances in lattice parameters are verified. From the verification of the diffraction angles in the planes (020) it is possible to calculate the advance of the associated interplanar distances ( $d$ ) by equation S1, which describes Bragg's law.<sup>1</sup>

$$2d_{hkl}\sin\theta = n\lambda \quad (\text{Eq. S1})$$

Where  $d_{hkl}$  is the interplanar distance,  $\theta$  is Bragg's angle,  $n$  is the order of diffraction ( $n = 1$ ), and  $\lambda$  is the wavelength of the X-ray used (here,  $Cu \text{ } K_{\alpha} \lambda = 1.5406 \text{ \AA}$ ).

Considering that there is no change in the crystalline structure, the lattice parameters ( $a$ ,  $b$ , and  $c$ ) can be calculated, from the  $d_{hkl}$  values presented in Table S1 for water, Table S2 for formic acid, and Table S3 for DMF, using the equation 2.

$$\frac{1}{d_{hkl}^2} = \frac{h^2}{a^2} + \frac{k^2}{b^2} + \frac{l^2}{c^2} \quad (\text{Eq. S2})$$

The average crystallite size ( $D$ ) as well as the inter-planar spacing between atoms ( $d$ -spacing) of the MoO<sub>3</sub>. For the samples were calculated by the Scherrer relation (Eq. 3).<sup>2</sup>

$$D = \frac{0.9\lambda}{\beta \cos\theta} \quad (\text{Eq. S3})$$

Where  $k$  is the shape factor with value  $k = 0.94$ ,  $\beta$  is the full width at half maxima (FWHM) for the plane (020), and  $\theta$  is the Bragg's angle.

Due to the exfoliation process, the structure it's susceptible to lattice strains ( $\xi$ ), which was calculated by the Wilson formula (Eq. S4). That given information about imperfection and distortion in the crystal structure.<sup>3,4</sup> The dislocation density associated with the displacement of atoms from the ideal position was calculated using the Equation S5.<sup>5</sup>

$$\xi = \frac{\beta_{hkl}}{4 \tan\theta_{hkl}} \quad (\text{Eq. S4})$$

$$\delta_{dis} = \frac{1}{D^2} \quad (\text{Eq. S5})$$

**Table S1** Water PXRD parameters

| Dose (kGy) | $2\theta_{(020)}$ | Lattice parameter (Å) |       |      | Interplanar distance d, (nm) | Cell Volume (Å <sup>3</sup> ) | Crystallite size, D (nm) | Dislocation Density $\delta_{dis}$ ( $\times 10^{-4}$ lines/nm) | Lattice strain, $\xi$ ( $\times 10^{-3}$ ) |
|------------|-------------------|-----------------------|-------|------|------------------------------|-------------------------------|--------------------------|-----------------------------------------------------------------|--------------------------------------------|
|            |                   | a                     | b     | c    |                              |                               |                          |                                                                 |                                            |
| 0          | 12.94             | 3.78                  | 13.68 | 3.25 | 0.68                         | 168.33                        | 57.41                    | 3.03                                                            | 5.27                                       |
| 30         | 12.83             | 3.80                  | 13.80 | 3.26 | 0.69                         | 170.94                        | 76.28                    | 1.72                                                            | 3.26                                       |
| 60         | 12.81             | 3.80                  | 13.80 | 3.26 | 0.69                         | 170.96                        | 71.69                    | 1.94                                                            | 3.03                                       |
| 90         | 12.79             | 3.80                  | 13.82 | 3.26 | 0.69                         | 171.32                        | 67.13                    | 2.22                                                            | 4.05                                       |

**Table S2** FA PXRD parameters

| Dose (kGy) | $2\theta_{(020)}$ | Lattice parameter (Å) |       |      | Interplanar distance d, (nm) | Cell Volume (Å <sup>3</sup> ) | Crystallite size, D (nm) | Dislocation Density $\delta_{dis}$ ( $\times 10^{-4}$ lines/nm) | Lattice strain, $\xi$ ( $\times 10^{-3}$ ) |
|------------|-------------------|-----------------------|-------|------|------------------------------|-------------------------------|--------------------------|-----------------------------------------------------------------|--------------------------------------------|
|            |                   | a                     | b     | c    |                              |                               |                          |                                                                 |                                            |
| 0          | 12.94             | 3.78                  | 13.68 | 3.25 | 0.68                         | 168.33                        | 57.41                    | 3.03                                                            | 5.27                                       |
| 30         | 12.89             | 3.79                  | 13.80 | 3.25 | 0.69                         | 170.67                        | 68.80                    | 2.11                                                            | 4.98                                       |
| 60         | 12.85             | 3.80                  | 13.78 | 3.26 | 0.69                         | 170.66                        | 73.80                    | 1.83                                                            | 3.02                                       |
| 90         | 12.82             | 3.80                  | 13.83 | 3.26 | 0.69                         | 171.28                        | 65.66                    | 2.32                                                            | 2.91                                       |

**Table S3** DMF PXRD parameters

| Dose (kGy) | $2\theta_{(020)}$ | Lattice parameter (Å) |       |      | Interplanar distance d, (nm) | Cell Volume (Å <sup>3</sup> ) | Crystallite size, D (nm) | Dislocation Density $\delta_{dis}$ ( $\times 10^{-4}$ lines/nm) | Lattice strain, $\xi$ ( $\times 10^{-3}$ ) |
|------------|-------------------|-----------------------|-------|------|------------------------------|-------------------------------|--------------------------|-----------------------------------------------------------------|--------------------------------------------|
|            |                   | a                     | b     | c    |                              |                               |                          |                                                                 |                                            |
| 0          | 12.94             | 3.78                  | 13.68 | 3.25 | 0.68                         | 168.33                        | 57.41                    | 3.03                                                            | 5.27                                       |
| 30         | 12.83             | 3.800                 | 13.79 | 3.25 | 0.69                         | 170.70                        | 61.75                    | 2.62                                                            | 4.73                                       |
| 60         | 12.80             | 3.801                 | 13.82 | 3.25 | 0.69                         | 171.01                        | 57.56                    | 3.02                                                            | 3.96                                       |
| 90         | 12.79             | 3.802                 | 13.82 | 3.23 | 0.69                         | 171.18                        | 58.28                    | 2.94                                                            | 3.27                                       |

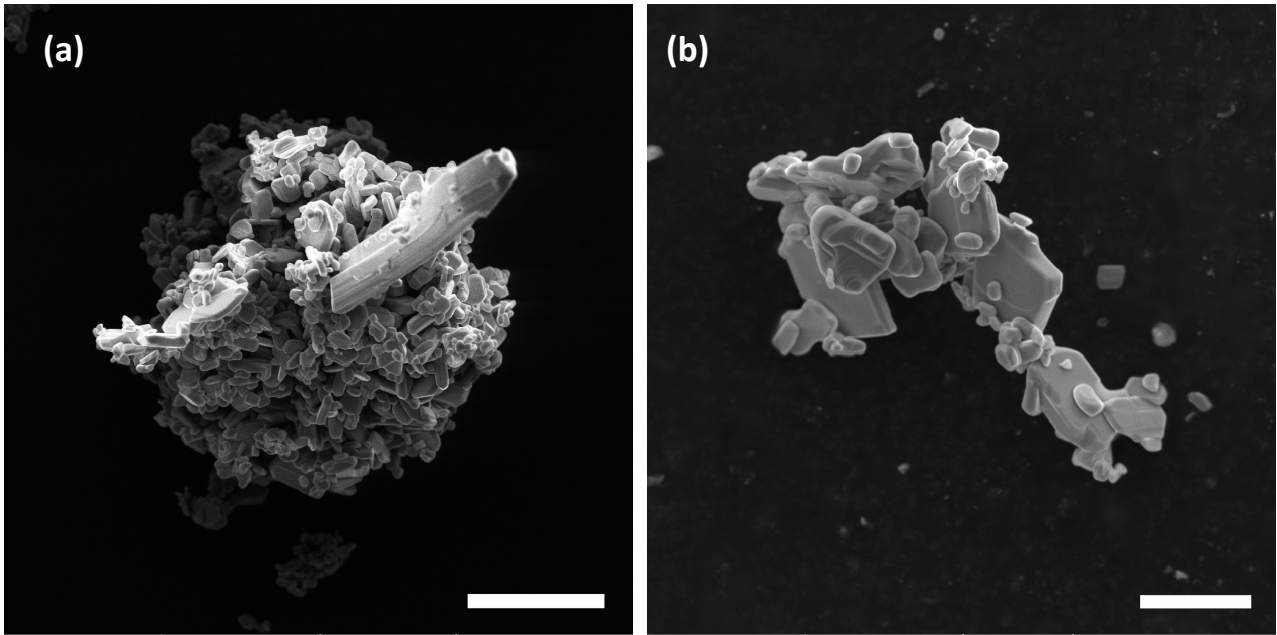

**Fig. S1** SEM images of MoO<sub>3-x</sub> water 90 kGy (a) scale bar 20 μm, and (b) scale bar 10 μm.

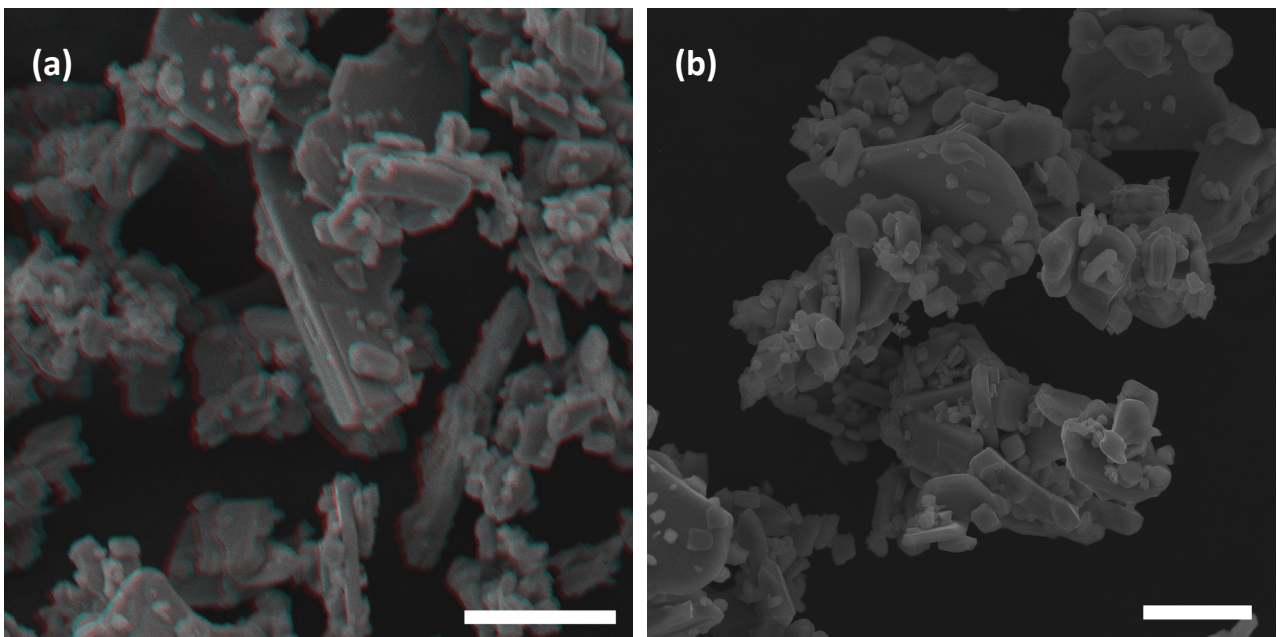

**Fig. S2** SEM images of MoO<sub>3-x</sub> DMF 90 kGy: (a) 3D image (required 3D glass) scale bar 20 μm, and (b) scale bar 10 μm.

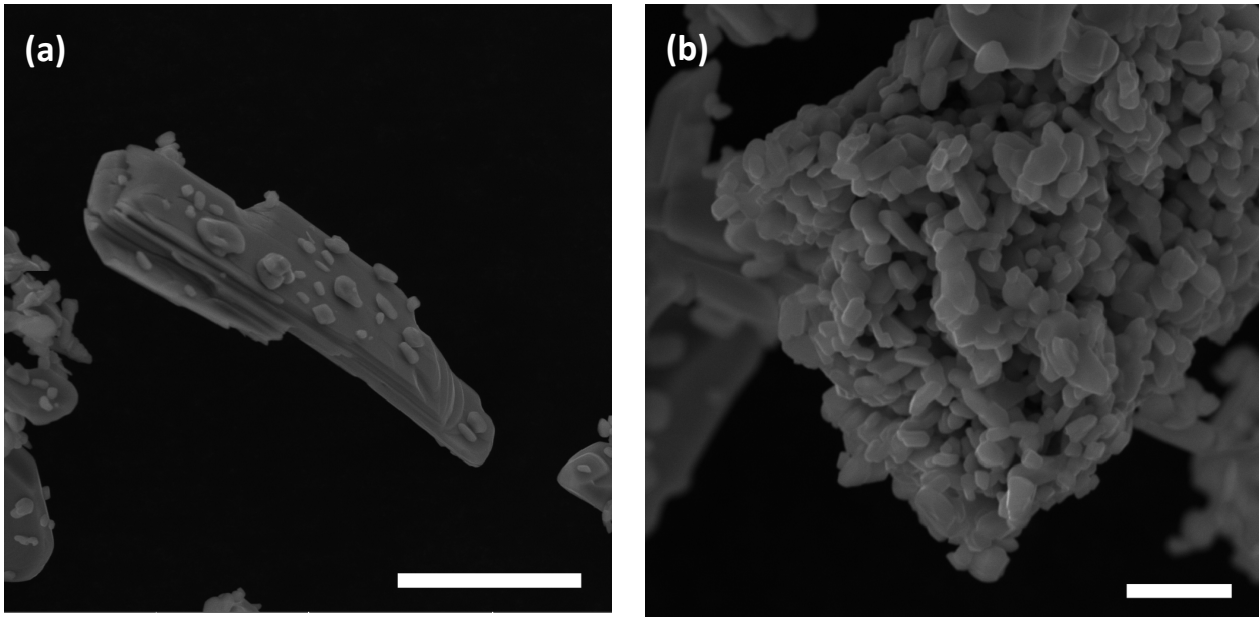

**Fig. S3** SEM images of MoO<sub>3-x</sub> FA 90 kGy (a) scale bar 20 μm, and (b) scale bar 5 μm.

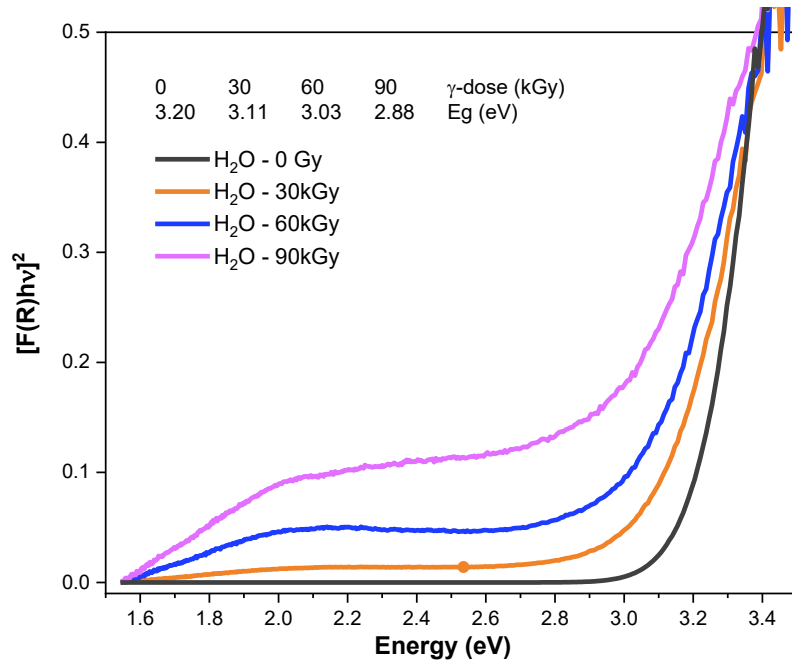

**Fig S4** Tauc plot for water-MoO<sub>3-x</sub>

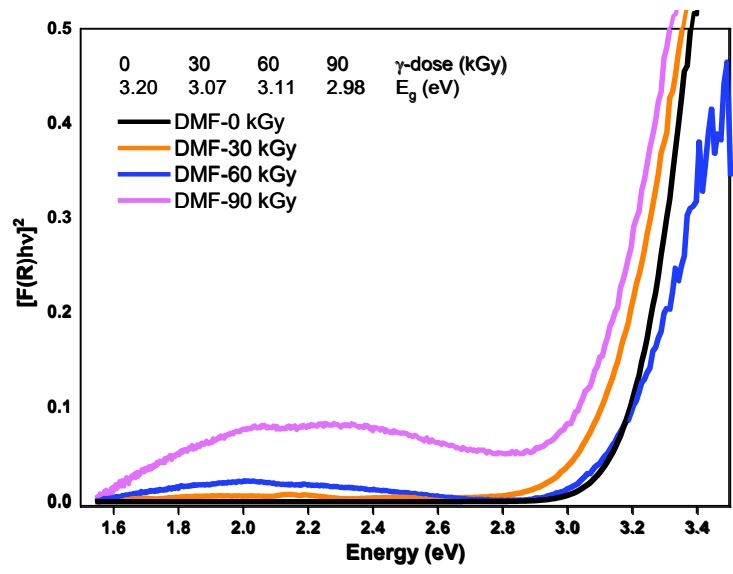

Fig S5 Tauc plot for DMF-MoO<sub>3-x</sub>

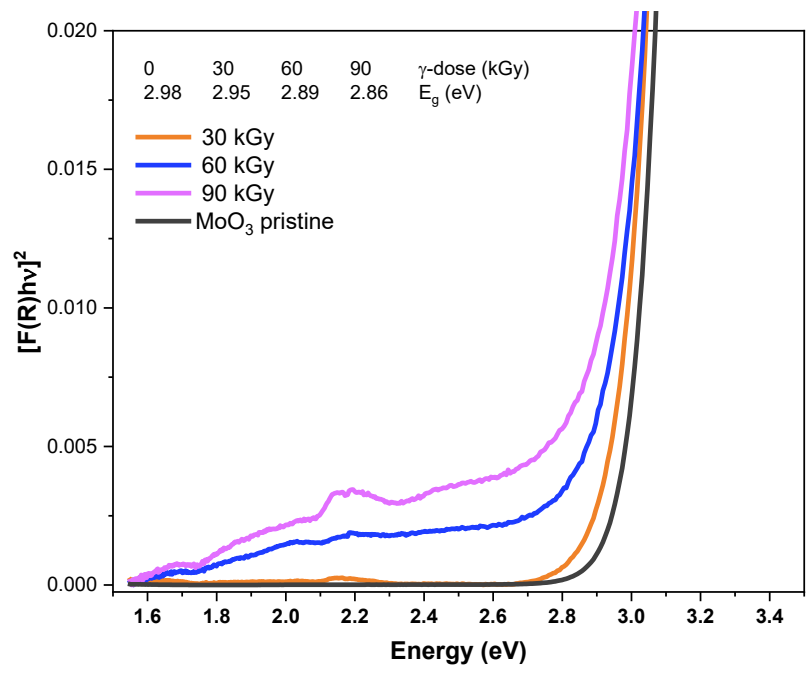

Fig S6 Tauc plot for FA-MoO<sub>3-x</sub>

## References

- <sup>1</sup> Kamoun O, Mami A, Amara MA, Vidu R, Amlouk M. Nanostructured Fe,Co-Codoped MoO<sub>3</sub> Thin Films. *Micromachines*. 2019; 10(2):138. <https://doi.org/10.3390/mi10020138>
- <sup>2</sup> N. Mohd Yusoff, H.K. Lee, E.K. Ng, A.F. Abas, M.T. Alresheedi, N.H. Zainol Abidin, M.A. Mahdi, Molybdenum trioxide decorated on tapered microfiber for mode-locked erbium-doped fiber laser, *Journal of Materials Research and Technology*, Volume 14, 2021, 942-953, <https://doi.org/10.1016/j.jmrt.2021.06.104>.
- <sup>3</sup> David L Bish Steve J. Chipera Steve J. Chipera. Accuracy in Quantitative X-Ray Powder Diffraction Analyses. *Advances in X-Ray Analysis* 38, 1995. 10.1007/978-1-4615-1797-9\_5
- <sup>4</sup> S.K. Sen, M. Noor, M.A. Al Mamun, M.S. Manir, M.A. Matin, M.A. Hakim, S. Nur, S. Dutta, An investigation of <sup>60</sup>Co gamma radiation-induced effects on the properties of nanostructured  $\alpha$ -MoO<sub>3</sub> for the application in optoelectronic and photonic devices, *Opt. Quant. Electron.* 51 (2019) 82, <https://doi.org/10.1007/s11082-019-1797-9>.
- <sup>5</sup> Khalate, S.A., Kate, R.S., Pathan, H.M. et al. Structural and electrochemical properties of spray deposited molybdenum trioxide ( $\alpha$ -MoO<sub>3</sub>) thin films. *J Solid State Electrochem* 21, 2737–2746 (2017). <https://doi.org/10.1007/s10008-017-3540-4>
